# Supplementary material for: Temporal dynamics of geothermal microbial communities in Aotearoa-New Zealand
Source: PubMed Central journal article supplement (PMC10068964; doi:10.3389/fmicb.2023.1094311), 2023-03-15
Supplement: Data_Sheet_1.pdf [file Data_Sheet_1.pdf]

## SUPPLEMENTARY INFORMATION

Power, J. F. et al. Temporal dynamics of geothermal microbial ecosystems in Aotearoa-New Zealand (2023).

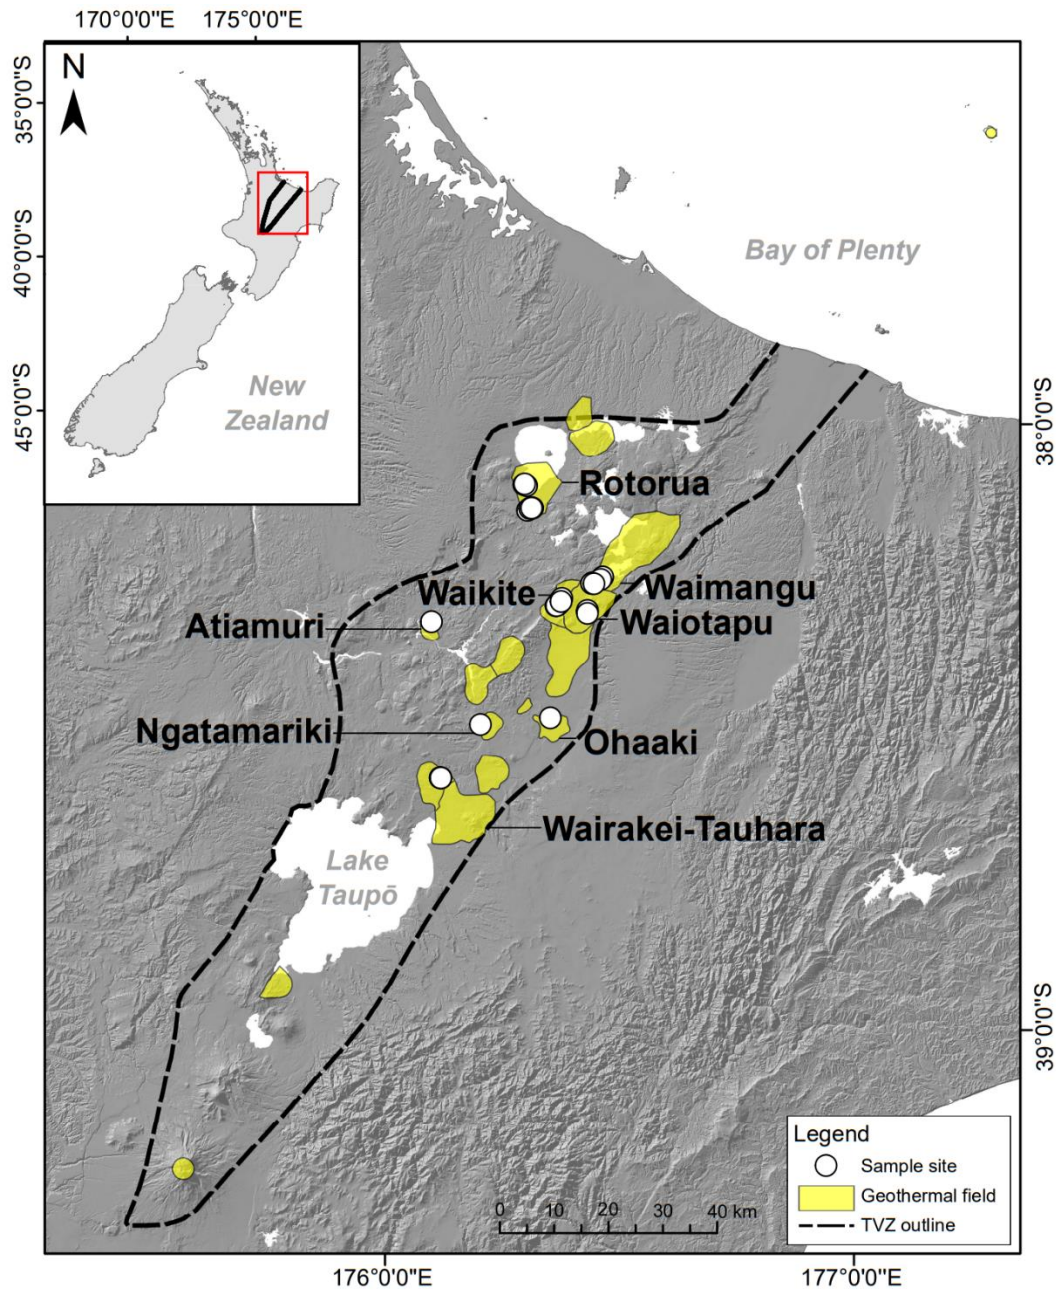

**Figure S1. Map of the Taupō Volcanic Zone (TVZ), Aotearoa-New Zealand.** Geothermal fields are presented in yellow, with fields used in this study labelled. Geothermal features sampled temporally are highlighted by white circles ( $n=31$ ). The panel insert displays the location of the TVZ in the central North Island of Aotearoa-New Zealand. The topographic layers for this map were obtained from Land Information New Zealand (LINZ; CC-BY-4.0) and the TVZ boundary defined using data from Wilson *et al.*, 1995.

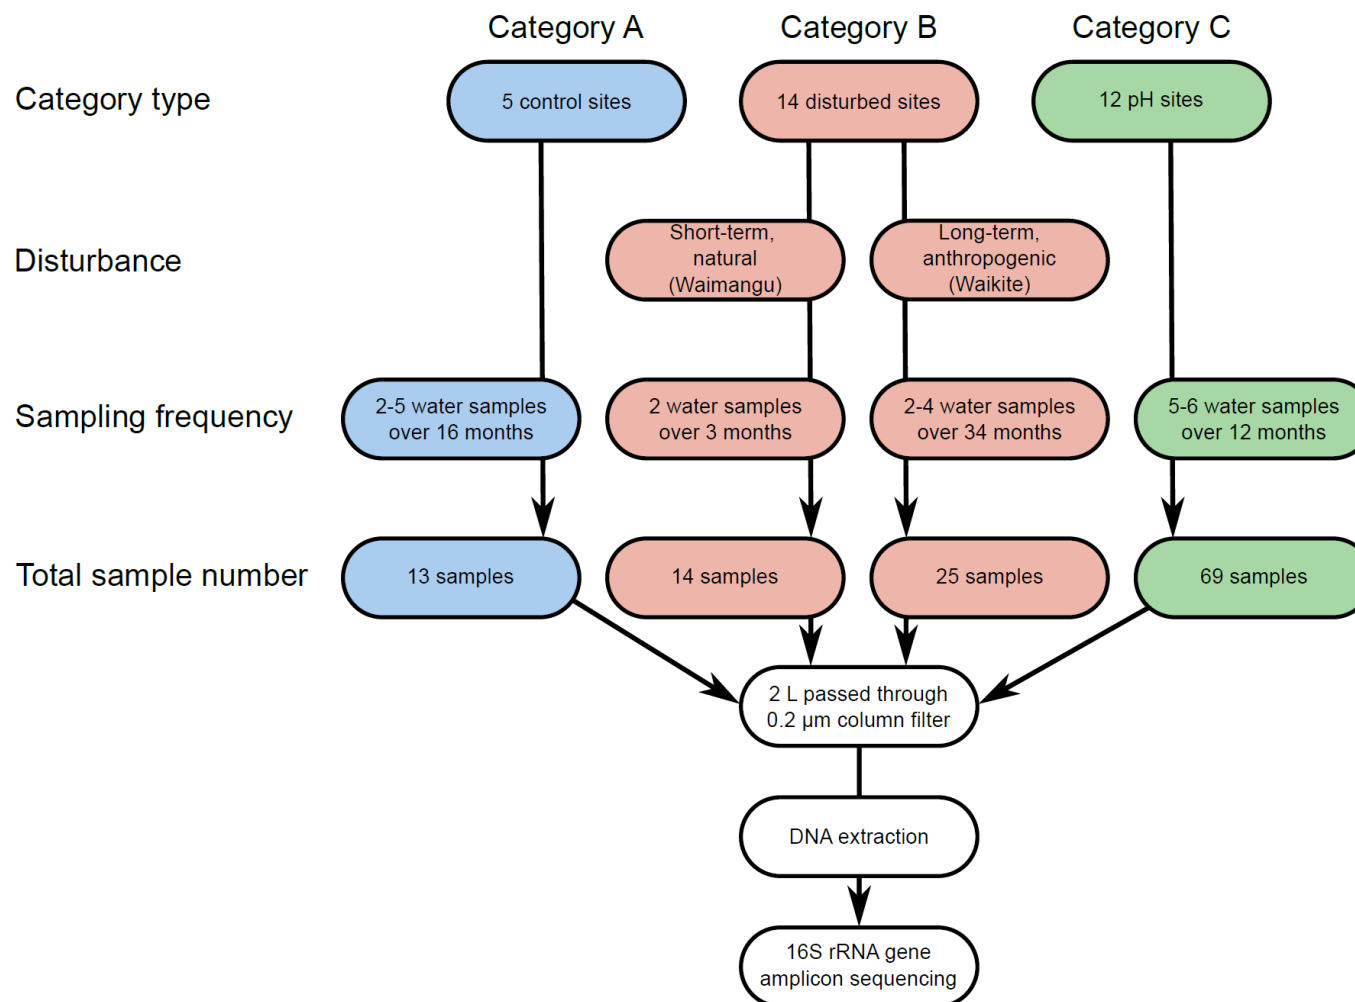

**Figure S2. Schematic overview of temporal site categories, sampling frequency, and sample processing.** Three categories of geothermal features are displayed in colour; control sites (category A; blue), disturbed sites (category B; red), and pH sites (category C; green). The disturbed sites were additionally split into two groups to allow study of both a short-term, natural disturbance and a long-term, anthropogenic disturbance to the microbial communities at Waimangu and Waikite geothermal fields, respectively.

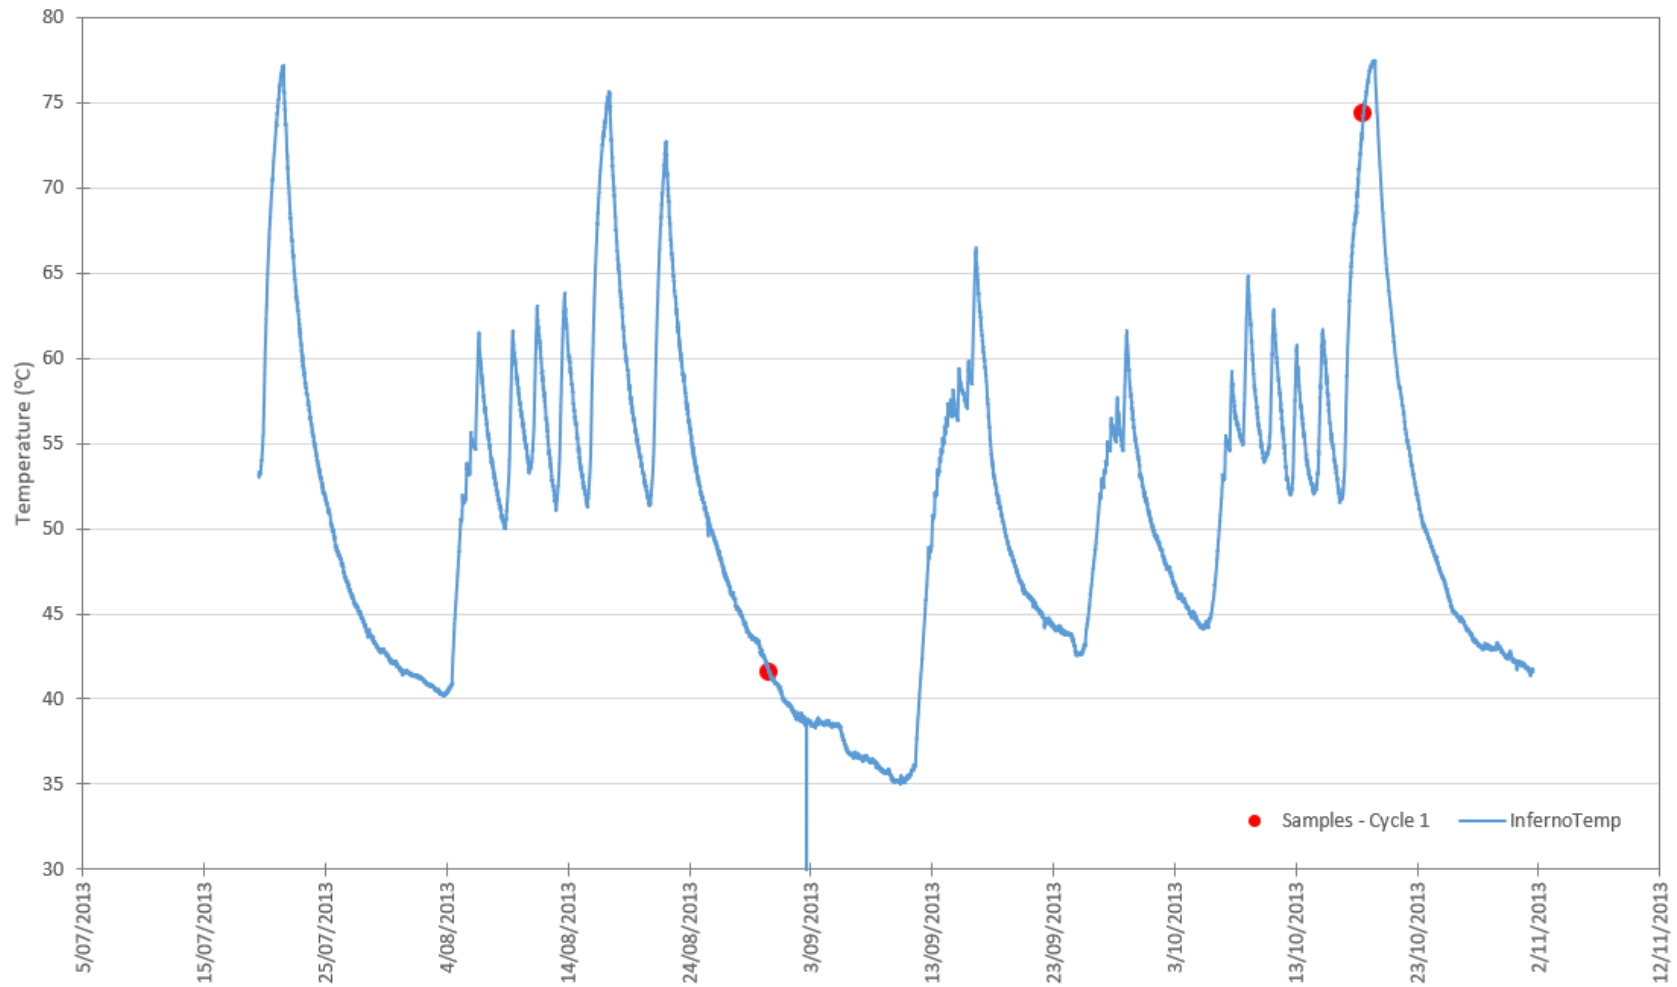

**Figure S3. Temperature profile of Inferno Crater Lake.** The ~30-40 day cycle of Inferno Crater Lake in the Waimangu geothermal field is indicated by the rise and fall of temperature on the y-axis, with overflow events into Waimangu Stream occurring when lake temperatures reached >70 °C. Timepoints of samples taken for this study are represented in red.

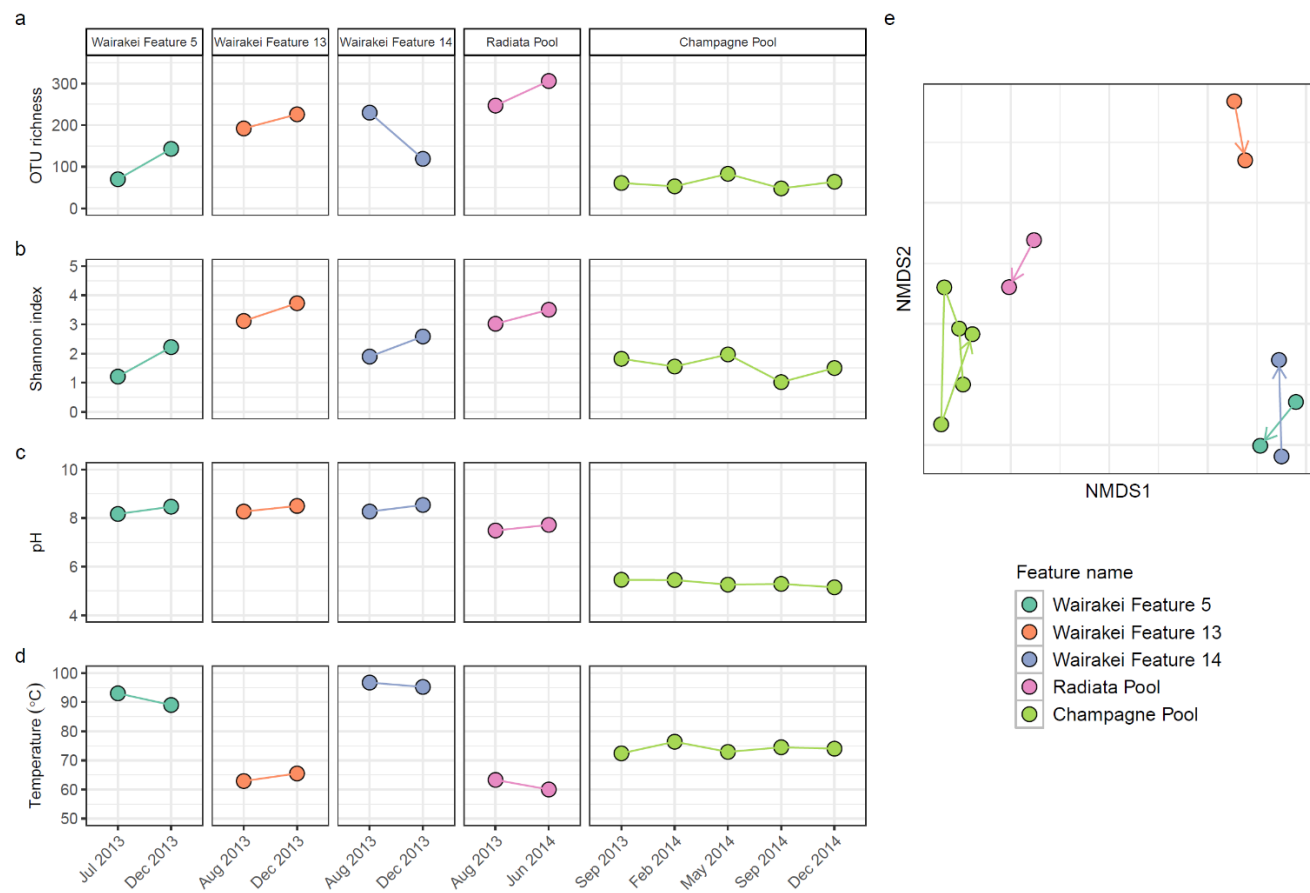

**Figure S4. Temporal diversity and physicochemistry of control features in the Taupō Volcanic Zone (TVZ), Aotearoa-New Zealand.** (a) The microbial communities of five control features were measured by amplicon sequencing of the 16S rRNA gene, with variation in alpha diversity between temporal samples indicated by OTU richness (i.e., the number of OTUs per community). (b) Alpha diversity was also measured by the Shannon diversity index to indicate evenness of the communities over time. (c) Spring pH of the features at the time of sampling. (d) Spring temperature of the control features. (e) Beta diversity of all five control features, distinguished by colour, is shown by a non-metric multidimensional scaling (NMDS;  $n=13$ , stress=0.1) of Bray-Curtis dissimilarities between samples. The timeline of sampling is indicated by the direction of the lines and arrows.

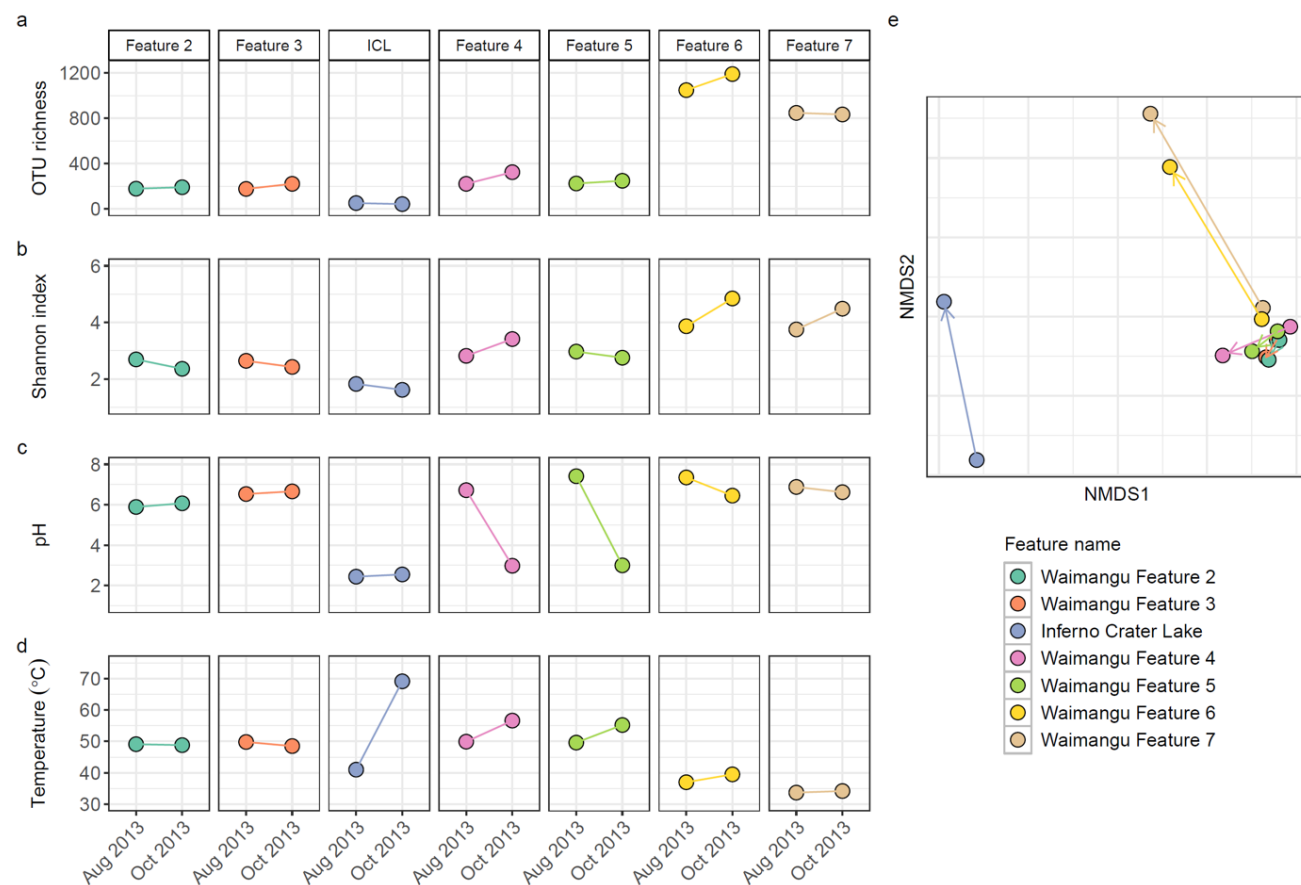

**Figure S5. Temporal diversity and physicochemistry of disturbed features at Waimangu geothermal field. (a)** The microbial communities of Waimangu Stream sites and Inferno Crater Lake (ICL) were measured by amplicon sequencing of the 16S rRNA gene, with variation in alpha diversity between samples indicated by OTU richness (i.e., the number of OTUs per community). **(b)** Alpha diversity was also measured by the Shannon diversity index to indicate evenness of the communities over time. **(c)** The pH of features at the time of sampling. **(d)** Temperature of both stream sites and Inferno Crater Lake. **(e)** Bray-Curtis dissimilarity was calculated for beta diversity, with nonmetric-multidimensional scaling (NMDS;  $n=14$ , stress=0.09) used to ordinate the samples in 2-dimensional space. Samples were taken before (August 2013) and during (October 2013) the overflow of Inferno Crater Lake into Waimangu Stream, with time indicated by arrows.

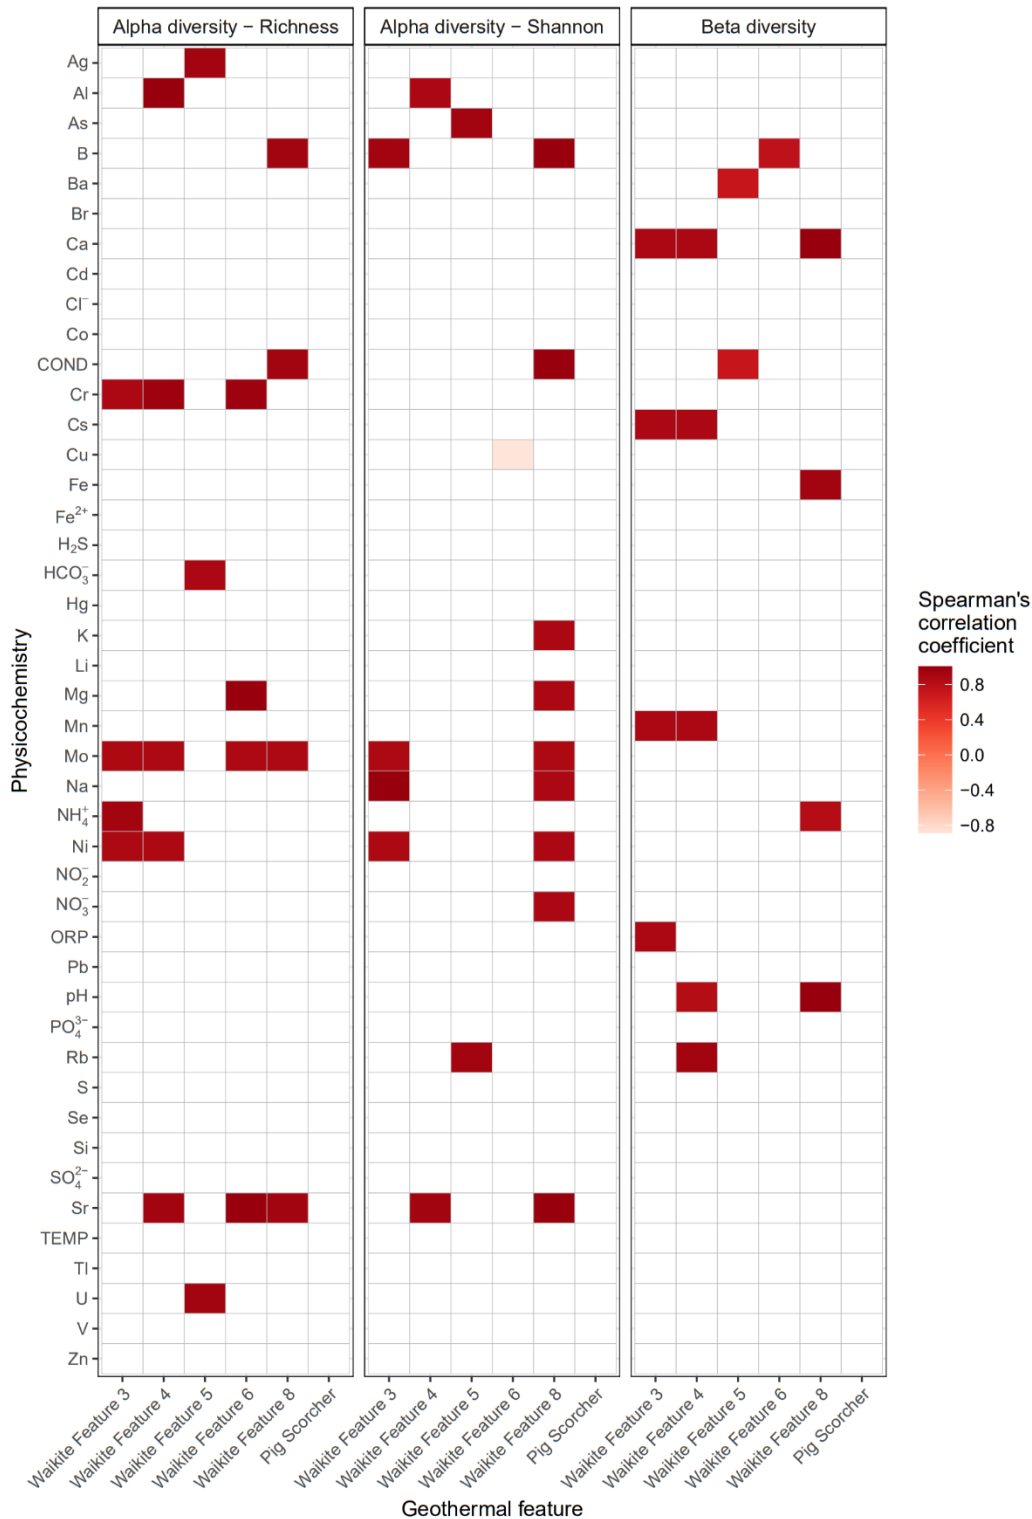

**Figure S6. Relationship between diversity and physicochemistry of Waikite geothermal features.** Diversity measures were calculated from amplicon sequencing of the 16S rRNA gene found in the microbial communities of these features over time. Alpha diversity was measured by both OTU richness (i.e., the number of OTUs in a community), and Shannon index (i.e., evenness of a community), with beta diversity determined by Bray-Curtis dissimilarities between temporal sites. Significant correlations ( $p < 0.05$ ) via Spearman's coefficient with all 44 physicochemical variables are displayed in colour.

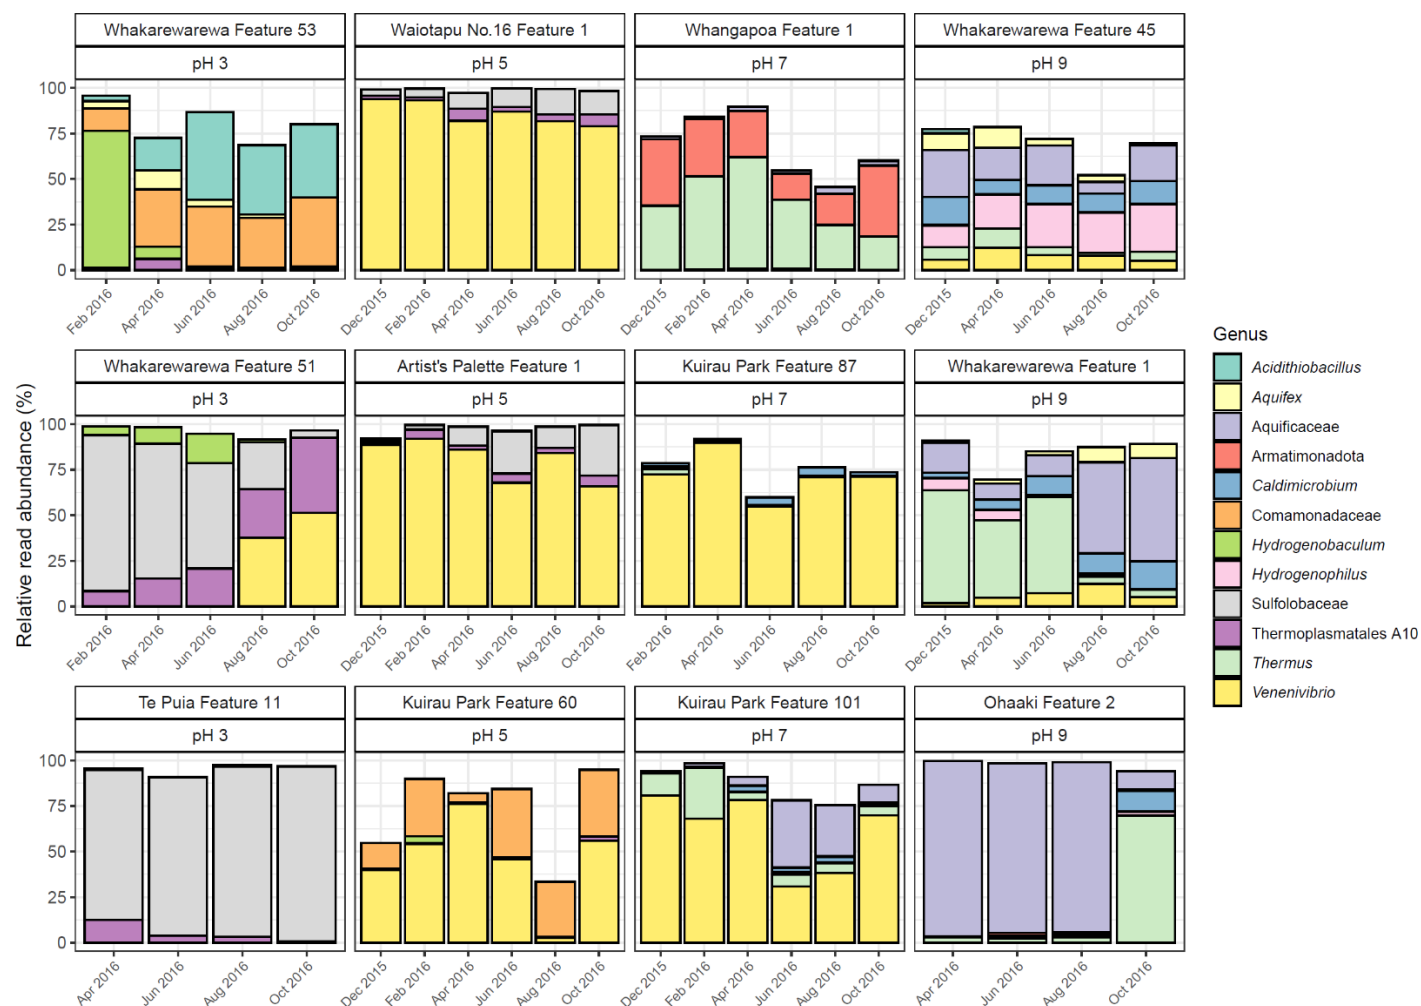

**Figure S7. Temporal community composition and relative abundance of genera in geothermal features across the pH scale.** Amplicon sequencing of the 16S rRNA gene was used to measure read abundance of taxa in spring communities, with only genera >1 % average relative abundance across all samples shown. Geothermal features are grouped according to their respective pH group (pH 3, 5, 7 and 9). Where taxonomy failed to classify to genus, the next corresponding taxonomic rank is displayed.

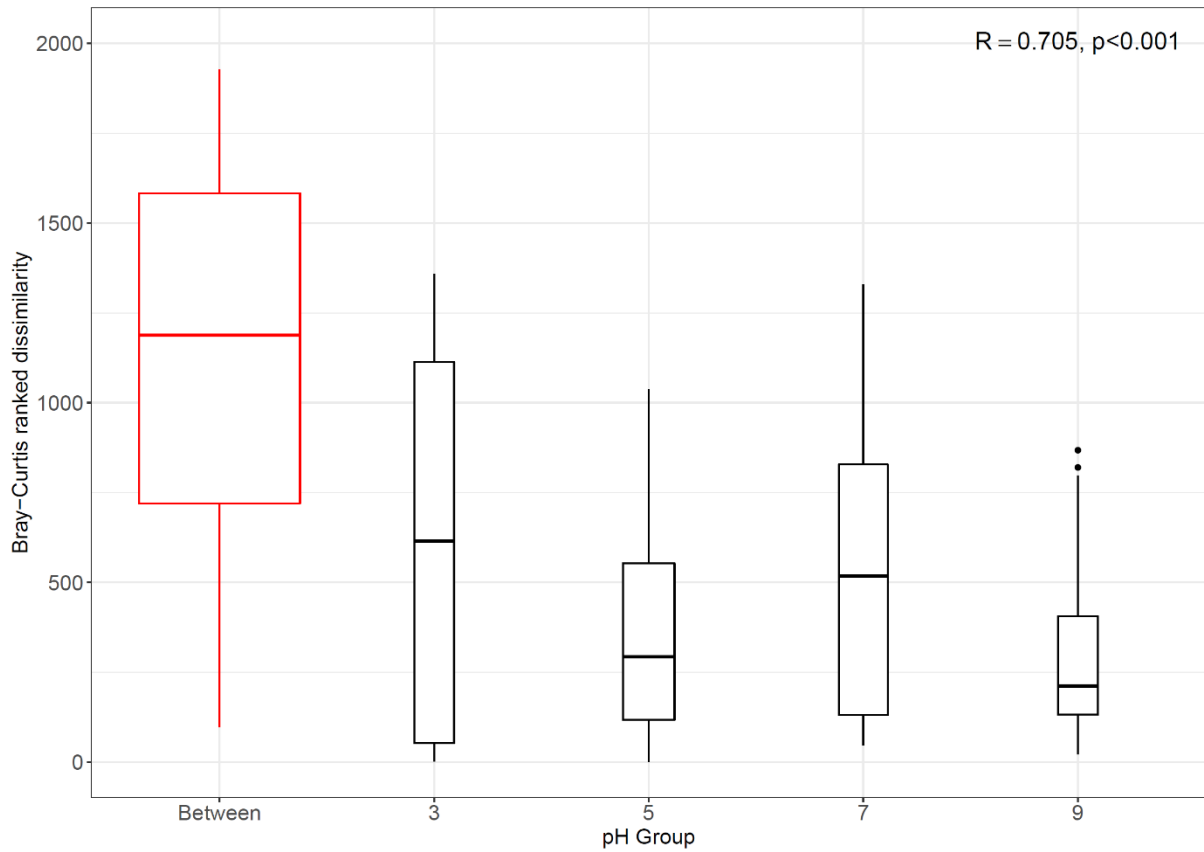

**Figure S8. Beta diversity comparison of temporal samples grouped to pH.** Bray-Curtis dissimilarity was used to calculate beta diversity from 16S rRNA gene sequencing of samples ( $n=63$ ) from across the pH range found in Aotearoa-New Zealand geothermal features. Samples were binned according to pH group (3, 5, 7 and 9), with analysis of similarities (ANOSIM) demonstrating that microbial diversity between pH groups (red) was greater than the diversity within individual groups ( $R=0.705$ ,  $p<0.001$ ).



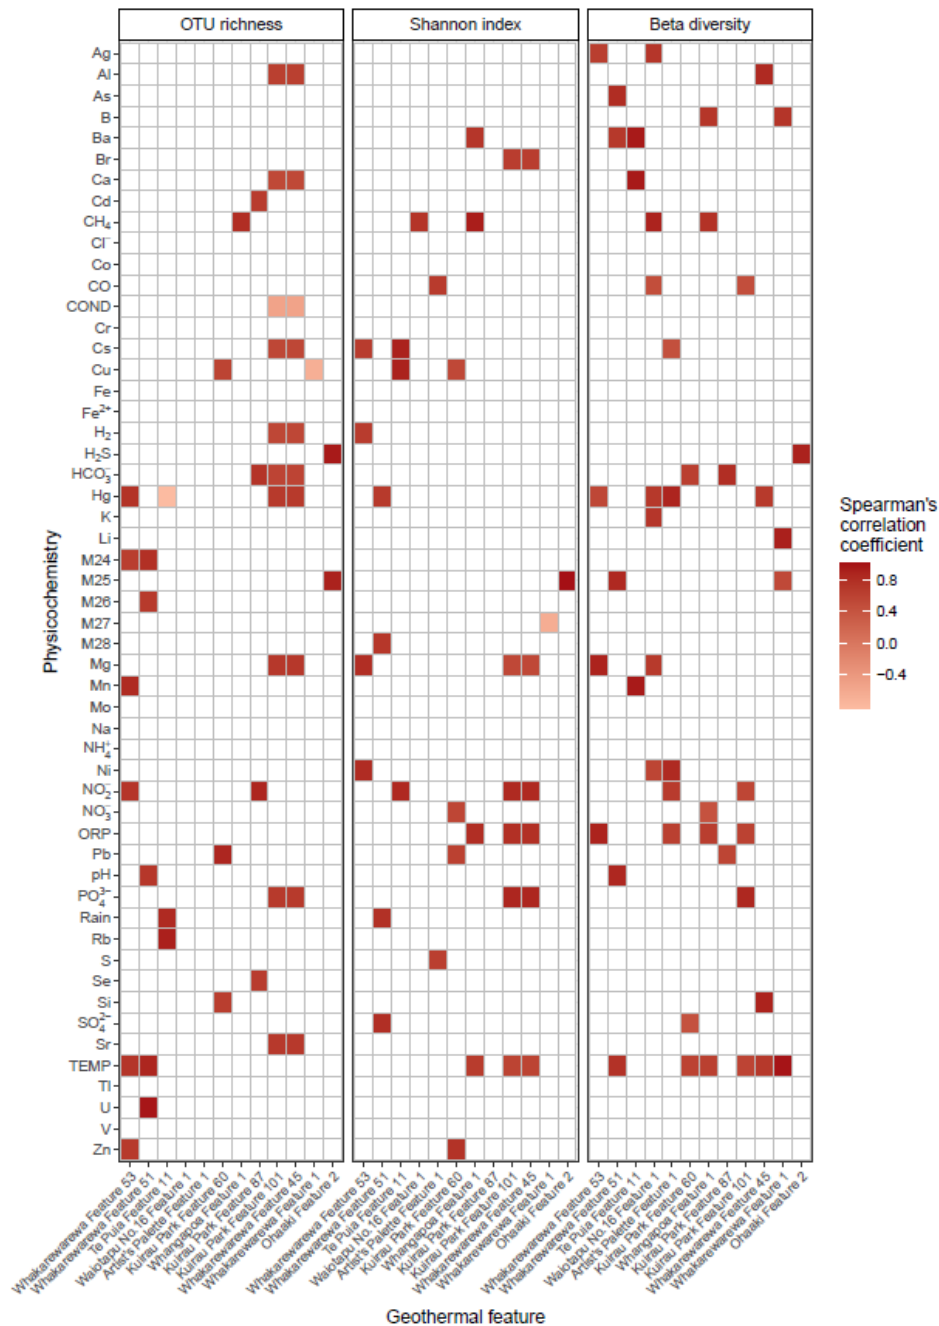

**Figure S9. Relationship between diversity and physicochemistry of geothermal features across the pH range.** Diversity measures were calculated from amplicon sequencing of the 16S rRNA gene found in the microbial communities of these features over time. Alpha diversity was measured by both OTU richness (i.e., the number of OTUs in a community), and Shannon index (i.e., evenness of a community), with beta diversity determined by Bray-Curtis dissimilarities between temporal sites. Significant correlations ( $p < 0.05$ ) with all 49 physicochemical variables are displayed in colour. Four features had positive correlations between alpha diversity and temperature ( $\rho \geq 0.57$ ,  $p \leq 0.03$ , Spearman's coefficient), while the six features that had significant positive correlations between beta diversity and temperature ( $\rho = 0.56-0.98$ ,  $p < 0.05$ ) were Whakarewarewa Feature 51, Kuirau Park Feature 60, Whangapoa Feature 1, Kuirau Park Feature 101, Whakarewarewa Feature 45, and Whakarewarewa Feature 1.

**Table S1. Control geothermal features and associated metadata.** Alpha diversity is represented by OTU richness (i.e., number of OTUs) and evenness (i.e., Shannon index) measured in these ecosystems via 16S rRNA gene amplicon sequencing. Accessions for sample sequences are also included.

| Sample ID | Study accession | Run accession | Feature name                 | Geothermal field | Date     | pH  | Temp (°C) | OTU Richness | Shannon |
|-----------|-----------------|---------------|------------------------------|------------------|----------|-----|-----------|--------------|---------|
| P1.0004   | PRJEB24353      | ERR2240132    | Wairakei Terraces Feature 5  | Wairakei-Tauhara | Jul 2013 | 8.2 | 93.0      | 70           | 1.2     |
| P1.0140   | PRJEB55115      | ERR10020314   | Wairakei Terraces Feature 5  | Wairakei-Tauhara | Dec 2013 | 8.5 | 89.0      | 143          | 2.2     |
| P1.0011   | PRJEB55115      | ERR10020306   | Wairakei Terraces Feature 13 | Wairakei-Tauhara | Aug 2013 | 8.3 | 62.9      | 192          | 3.1     |
| P1.0148   | PRJEB24353      | ERR2240256    | Wairakei Terraces Feature 13 | Wairakei-Tauhara | Dec 2013 | 8.5 | 65.5      | 226          | 3.7     |
| P1.0010   | PRJEB55115      | ERR10020305   | Wairakei Terraces Feature 14 | Wairakei-Tauhara | Aug 2013 | 8.3 | 96.7      | 230          | 1.9     |
| P1.0149   | PRJEB24353      | ERR2240257    | Wairakei Terraces Feature 14 | Wairakei-Tauhara | Dec 2013 | 8.5 | 95.2      | 119          | 2.6     |
| P1.0019   | PRJEB24353      | ERR2240145    | Radiata Pool                 | Ngatamariki      | Aug 2013 | 7.5 | 63.3      | 247          | 3.0     |
| P1.0482   | PRJEB55115      | ERR10020323   | Radiata Pool                 | Ngatamariki      | Jun 2014 | 7.7 | 60.0      | 306          | 3.5     |
| P1.0054   | PRJEB24353      | ERR2240180    | Champagne Pool               | Waiotapu         | Sep 2013 | 5.5 | 72.4      | 61           | 1.8     |
| P1.0236   | PRJEB55115      | ERR10020321   | Champagne Pool               | Waiotapu         | Feb 2014 | 5.5 | 76.4      | 53           | 1.6     |
| P1.0472   | PRJEB55115      | ERR10020322   | Champagne Pool               | Waiotapu         | May 2014 | 5.3 | 72.9      | 83           | 2.0     |
| P1.0675   | PRJEB55115      | ERR10020324   | Champagne Pool               | Waiotapu         | Sep 2014 | 5.3 | 74.5      | 48           | 1.0     |
| P1.0923   | PRJEB55115      | ERR10020325   | Champagne Pool               | Waiotapu         | Dec 2014 | 5.2 | 74.0      | 64           | 1.5     |

**Table S2. Disturbed features and associated metadata at Waimangu geothermal field.** This subset of samples were taken from Waimangu Stream and Inferno Crater Lake, before (August 2013) and during (October 2013) an overflow of hydrothermal fluid from Inferno Crater Lake into the stream. Accessions for sample sequences are also included.

| Sample ID | Study accession | Run accession | Feature name              | Geothermal field | Date     | pH  | Temp (°C) | OTU Richness | Shannon |
|-----------|-----------------|---------------|---------------------------|------------------|----------|-----|-----------|--------------|---------|
| P1.0027   | PRJEB24353      | ERR2240153    | Waimangu Stream Feature 2 | Waimangu         | Aug 2013 | 5.9 | 49.1      | 178          | 2.7     |
| P1.0110   | PRJEB55115      | ERR10020313   | Waimangu Stream Feature 2 | Waimangu         | Oct 2013 | 6.1 | 48.8      | 191          | 2.4     |
| P1.0028   | PRJEB24353      | ERR2240154    | Waimangu Stream Feature 3 | Waimangu         | Aug 2013 | 6.5 | 49.8      | 176          | 2.6     |
| P1.0109   | PRJEB55115      | ERR10020312   | Waimangu Stream Feature 3 | Waimangu         | Oct 2013 | 6.7 | 48.5      | 221          | 2.4     |
| P1.0037   | PRJEB24353      | ERR2240163    | Inferno Crater Lake       | Waimangu         | Aug 2013 | 2.4 | 41.0      | 51           | 1.8     |
| P1.0108   | PRJEB55115      | ERR10020311   | Inferno Crater Lake       | Waimangu         | Oct 2013 | 2.6 | 69.1      | 42           | 1.6     |
| P1.0029   | PRJEB24353      | ERR2240155    | Waimangu Stream Feature 4 | Waimangu         | Aug 2013 | 6.7 | 49.9      | 221          | 2.8     |
| P1.0107   | PRJEB55115      | ERR10020310   | Waimangu Stream Feature 4 | Waimangu         | Oct 2013 | 3.0 | 56.6      | 324          | 3.4     |
| P1.0030   | PRJEB24353      | ERR2240156    | Waimangu Stream Feature 5 | Waimangu         | Aug 2013 | 7.4 | 49.6      | 224          | 3.0     |
| P1.0106   | PRJEB55115      | ERR10020309   | Waimangu Stream Feature 5 | Waimangu         | Oct 2013 | 3.0 | 55.2      | 248          | 2.8     |
| P1.0032   | PRJEB24353      | ERR2240158    | Waimangu Stream Feature 6 | Waimangu         | Aug 2013 | 7.4 | 37.0      | 1049         | 3.9     |
| P1.0105   | PRJEB55115      | ERR10020308   | Waimangu Stream Feature 6 | Waimangu         | Oct 2013 | 6.5 | 39.5      | 1191         | 4.8     |
| P1.0031   | PRJEB24353      | ERR2240157    | Waimangu Stream Feature 7 | Waimangu         | Aug 2013 | 6.9 | 33.7      | 848          | 3.8     |
| P1.0104   | PRJEB55115      | ERR10020307   | Waimangu Stream Feature 7 | Waimangu         | Oct 2013 | 6.6 | 34.2      | 834          | 4.5     |

**Table S3. Disturbed features and associated metadata at Waikite geothermal field.** These features were analysed before and after a long-term, anthropogenic disturbance was introduced to a geothermal wetland undergoing rehabilitation. Accessions for sample sequences are also included.

| Sample ID | Study accession | Run accession | Feature name                   | Description       | Geothermal field | Date     | pH  | Temp (°C) | OTU richness | Shannon |
|-----------|-----------------|---------------|--------------------------------|-------------------|------------------|----------|-----|-----------|--------------|---------|
| P1.0130   | PRJEB24353      | ERR2240240    | Waikite Restoration Feature 3  | Stream upgradient | Waikite          | Dec 2013 | 8.6 | 44.3      | 766          | 4.5     |
| P1.0171   | PRJEB55115      | ERR10020316   | Waikite Restoration Feature 3  | Stream upgradient | Waikite          | Jan 2014 | 8.4 | 39.9      | 906          | 4.2     |
| P1.1004   | PRJEB55115      | ERR10020329   | Waikite Restoration Feature 3  | Stream upgradient | Waikite          | Apr 2015 | 8.5 | 37.8      | 1358         | 5.3     |
| P1.1017   | PRJEB55115      | ERR10020337   | Waikite Restoration Feature 3  | Stream upgradient | Waikite          | Oct 2016 | 8.3 | 39.5      | 805          | 4.1     |
| P1.0131   | PRJEB24353      | ERR2240241    | Waikite Restoration Feature 4  | Wetland - inlet   | Waikite          | Dec 2013 | 8.5 | 47.2      | 1118         | 4.8     |
| P1.0172   | PRJEB55115      | ERR10020317   | Waikite Restoration Feature 4  | Wetland - inlet   | Waikite          | Jan 2014 | 8.4 | 42.2      | 1308         | 5.0     |
| P1.1005   | PRJEB55115      | ERR10020330   | Waikite Restoration Feature 4  | Wetland - inlet   | Waikite          | Apr 2015 | 8.3 | 39.0      | 1709         | 5.6     |
| P1.1016   | PRJEB55115      | ERR10020336   | Waikite Restoration Feature 4  | Wetland - inlet   | Waikite          | Oct 2016 | 8.1 | 41.3      | 1030         | 4.2     |
| P1.0132   | PRJEB24353      | ERR2240242    | Waikite Restoration Feature 5  | Wetland - hot     | Waikite          | Dec 2013 | 8.4 | 70.0      | 999          | 5.1     |
| P1.0173   | PRJEB55115      | ERR10020318   | Waikite Restoration Feature 5  | Wetland - hot     | Waikite          | Jan 2014 | 8.4 | 67.9      | 826          | 5.1     |
| P1.1007   | PRJEB55115      | ERR10020332   | Waikite Restoration Feature 5  | Wetland - hot     | Waikite          | Apr 2015 | 8.2 | 65.7      | 887          | 4.8     |
| P1.1015   | PRJEB55115      | ERR10020335   | Waikite Restoration Feature 5  | Wetland - hot     | Waikite          | Oct 2016 | 8.1 | 65.5      | 667          | 4.4     |
| P1.0133   | PRJEB24353      | ERR2240243    | Waikite Restoration Feature 6  | Wetland - warm    | Waikite          | Dec 2013 | 8.3 | 53.2      | 762          | 4.4     |
| P1.0174   | PRJEB55115      | ERR10020319   | Waikite Restoration Feature 6  | Wetland - warm    | Waikite          | Jan 2014 | 8.3 | 43.8      | 1606         | 5.9     |
| P1.1002   | PRJEB55115      | ERR10020327   | Waikite Restoration Feature 6  | Wetland - warm    | Waikite          | Apr 2015 | 7.7 | 23.3      | 2613         | 6.2     |
| P1.1014   | PRJEB55115      | ERR10020334   | Waikite Restoration Feature 6  | Wetland - warm    | Waikite          | Oct 2016 | 7.5 | 29.9      | 1138         | 5.2     |
| P1.0135   | PRJEB24353      | ERR2240245    | Waikite Restoration Feature 8  | Wetland - outlet  | Waikite          | Dec 2013 | 8.6 | 46.0      | 1375         | 5.5     |
| P1.0176   | PRJEB55115      | ERR10020320   | Waikite Restoration Feature 8  | Wetland - outlet  | Waikite          | Jan 2014 | 8.6 | 42.8      | 1509         | 5.6     |
| P1.1001   | PRJEB55115      | ERR10020326   | Waikite Restoration Feature 8  | Wetland - outlet  | Waikite          | Apr 2015 | 7.7 | 27.5      | 2877         | 7.0     |
| P1.1013   | PRJEB55115      | ERR10020333   | Waikite Restoration Feature 8  | Wetland - outlet  | Waikite          | Oct 2016 | 7.6 | 26.0      | 1242         | 4.4     |
| P1.0129   | PRJEB24353      | ERR2240239    | Waikite Restoration Feature 2  | Pig Scorcher      | Waikite          | Dec 2013 | 7.2 | 95.8      | 189          | 2.7     |
| P1.0170   | PRJEB55115      | ERR10020315   | Waikite Restoration Feature 2  | Pig Scorcher      | Waikite          | Jan 2014 | 7.2 | 93.8      | 277          | 2.4     |
| P1.1003   | PRJEB55115      | ERR10020328   | Waikite Restoration Feature 2  | Pig Scorcher      | Waikite          | Apr 2015 | 7.1 | 87.2      | 135          | 0.9     |
| P1.0181   | PRJEB24353      | ERR2240282    | Waikite Restoration Feature 13 | Big Spring        | Waikite          | Jan 2014 | 7.5 | 96.5      | 284          | 3.9     |
| P1.1006   | PRJEB55115      | ERR10020331   | Waikite Restoration Feature 13 | Big Spring        | Waikite          | Apr 2015 | 7.4 | 94.5      | 411          | 4.0     |

**Table S4. pH features and associated metadata.** Samples were taken from 12 geothermal features across the pH range commonly found in features from the Taupō Volcanic Zone (TVZ), Aotearoa-New Zealand (pH groups 3, 5, 7, and 9). All features had a similar temperature range of ~60-70 °C. Accessions for sample sequences are also included.

| Sample ID | Study accession | Run accession | Feature name               | pH group | Geothermal field | Date     | pH  | Temp (°C) | Richness | Shannon |
|-----------|-----------------|---------------|----------------------------|----------|------------------|----------|-----|-----------|----------|---------|
| P2.0019   | PRJEB55115      | ERR10020352   | Whakarewarewa Feature 53   | 3        | Rotorua          | Feb 2016 | 3.0 | 60.1      | 39       | 1.1     |
| P2.0024   | PRJEB55115      | ERR10020355   | Whakarewarewa Feature 53   | 3        | Rotorua          | Apr 2016 | 3.1 | 59.1      | 41       | 2.2     |
| P2.0036   | PRJEB55115      | ERR10020367   | Whakarewarewa Feature 53   | 3        | Rotorua          | Jun 2016 | 3.1 | 57.2      | 37       | 1.6     |
| P2.0048   | PRJEB55115      | ERR10020379   | Whakarewarewa Feature 53   | 3        | Rotorua          | Aug 2016 | 3.0 | 50.8      | 30       | 1.8     |
| P2.0060   | PRJEB55115      | ERR10020391   | Whakarewarewa Feature 53   | 3        | Rotorua          | Oct 2016 | 2.9 | 53.0      | 28       | 1.6     |
| P2.0017   | PRJEB55115      | ERR10020351   | Whakarewarewa Feature 51   | 3        | Rotorua          | Feb 2016 | 3.3 | 70.3      | 24       | 1.3     |
| P2.0026   | PRJEB55115      | ERR10020357   | Whakarewarewa Feature 51   | 3        | Rotorua          | Apr 2016 | 3.6 | 67.1      | 25       | 1.6     |
| P2.0038   | PRJEB55115      | ERR10020369   | Whakarewarewa Feature 51   | 3        | Rotorua          | Jun 2016 | 4.0 | 66.3      | 27       | 1.7     |
| P2.0050   | PRJEB55115      | ERR10020381   | Whakarewarewa Feature 51   | 3        | Rotorua          | Aug 2016 | 4.6 | 60.0      | 45       | 2.1     |
| P2.0062   | PRJEB55115      | ERR10020393   | Whakarewarewa Feature 51   | 3        | Rotorua          | Oct 2016 | 4.8 | 60.6      | 39       | 1.5     |
| P2.0023   | PRJEB55115      | ERR10020354   | Te Puia Feature 11         | 3        | Rotorua          | Apr 2016 | 2.4 | 67.4      | 21       | 1.3     |
| P2.0035   | PRJEB55115      | ERR10020366   | Te Puia Feature 11         | 3        | Rotorua          | Jun 2016 | 2.5 | 66.1      | 23       | 1.2     |
| P2.0047   | PRJEB55115      | ERR10020378   | Te Puia Feature 11         | 3        | Rotorua          | Aug 2016 | 2.6 | 61.8      | 16       | 1.0     |
| P2.0059   | PRJEB55115      | ERR10020390   | Te Puia Feature 11         | 3        | Rotorua          | Oct 2016 | 2.5 | 64.0      | 19       | 0.9     |
| P2.0002   | PRJEB55115      | ERR10020339   | Waiotapu No.16 Feature 1   | 5        | Waiotapu         | Dec 2015 | 4.6 | 64.9      | 33       | 0.9     |
| P2.0012   | PRJEB55115      | ERR10020347   | Waiotapu No.16 Feature 1   | 5        | Waiotapu         | Feb 2016 | 4.6 | 67.5      | 36       | 0.9     |
| P2.0032   | PRJEB55115      | ERR10020363   | Waiotapu No.16 Feature 1   | 5        | Waiotapu         | Apr 2016 | 5.0 | 67.2      | 40       | 1.3     |
| P2.0044   | PRJEB55115      | ERR10020375   | Waiotapu No.16 Feature 1   | 5        | Waiotapu         | Jun 2016 | 4.9 | 67.0      | 34       | 1.1     |
| P2.0056   | PRJEB55115      | ERR10020387   | Waiotapu No.16 Feature 1   | 5        | Waiotapu         | Aug 2016 | 4.7 | 65.6      | 32       | 1.1     |
| P2.0068   | PRJEB55115      | ERR10020399   | Waiotapu No.16 Feature 1   | 5        | Waiotapu         | Oct 2016 | 4.7 | 68.0      | 35       | 1.2     |
| P2.0003   | PRJEB55115      | ERR10020340   | Artist's Palette Feature 1 | 5        | Waiotapu         | Dec 2015 | 5.1 | 59.4      | 90       | 1.4     |
| P2.0011   | PRJEB55115      | ERR10020346   | Artist's Palette Feature 1 | 5        | Waiotapu         | Feb 2016 | 4.8 | 67.9      | 48       | 1.0     |
| P2.0033   | PRJEB55115      | ERR10020364   | Artist's Palette Feature 1 | 5        | Waiotapu         | Apr 2016 | 4.9 | 66.5      | 63       | 1.3     |
| P2.0045   | PRJEB55115      | ERR10020376   | Artist's Palette Feature 1 | 5        | Waiotapu         | Jun 2016 | 4.8 | 64.7      | 87       | 1.7     |
| P2.0057   | PRJEB55115      | ERR10020388   | Artist's Palette Feature 1 | 5        | Waiotapu         | Aug 2016 | 4.7 | 66.9      | 74       | 1.4     |

| Sample ID | Study accession | Run accession | Feature name               | pH group | Geothermal field | Date     | pH  | Temp (°C) | Richness | Shannon |
|-----------|-----------------|---------------|----------------------------|----------|------------------|----------|-----|-----------|----------|---------|
| P2.0069   | PRJEB55115      | ERR10020400   | Artist's Palette Feature 1 | 5        | Waiotapu         | Oct 2016 | 4.8 | 71.9      | 57       | 1.6     |
| P2.0006   | PRJEB55115      | ERR10020342   | Kuirau Park Feature 60     | 5        | Rotorua          | Dec 2015 | 5.2 | 59.2      | 70       | 1.9     |
| P2.0015   | PRJEB55115      | ERR10020350   | Kuirau Park Feature 60     | 5        | Rotorua          | Feb 2016 | 5.2 | 61.0      | 73       | 1.8     |
| P2.0031   | PRJEB55115      | ERR10020362   | Kuirau Park Feature 60     | 5        | Rotorua          | Apr 2016 | 5.3 | 56.6      | 90       | 2.0     |
| P2.0043   | PRJEB55115      | ERR10020374   | Kuirau Park Feature 60     | 5        | Rotorua          | Jun 2016 | 5.0 | 51.7      | 138      | 2.2     |
| P2.0055   | PRJEB55115      | ERR10020386   | Kuirau Park Feature 60     | 5        | Rotorua          | Aug 2016 | 4.9 | 45.8      | 119      | 1.8     |
| P2.0067   | PRJEB55115      | ERR10020398   | Kuirau Park Feature 60     | 5        | Rotorua          | Oct 2016 | 4.5 | 51.3      | 88       | 1.8     |
| P2.0001   | PRJEB55115      | ERR10020338   | Whangapoa Feature 1        | 7        | Atiamuri         | Dec 2015 | 7.6 | 63.3      | 123      | 2.5     |
| P2.0010   | PRJEB55115      | ERR10020345   | Whangapoa Feature 1        | 7        | Atiamuri         | Feb 2016 | 7.3 | 65.3      | 114      | 2.2     |
| P2.0028   | PRJEB55115      | ERR10020359   | Whangapoa Feature 1        | 7        | Atiamuri         | Apr 2016 | 7.1 | 63.8      | 90       | 2.0     |
| P2.0040   | PRJEB55115      | ERR10020371   | Whangapoa Feature 1        | 7        | Atiamuri         | Jun 2016 | 7.1 | 61.0      | 129      | 2.8     |
| P2.0052   | PRJEB55115      | ERR10020383   | Whangapoa Feature 1        | 7        | Atiamuri         | Aug 2016 | 7.1 | 60.8      | 147      | 3.0     |
| P2.0064   | PRJEB55115      | ERR10020395   | Whangapoa Feature 1        | 7        | Atiamuri         | Oct 2016 | 7.6 | 62.7      | 122      | 2.7     |
| P2.0013   | PRJEB55115      | ERR10020348   | Kuirau Park Feature 87     | 7        | Rotorua          | Feb 2016 | 6.6 | 63.8      | 196      | 2.3     |
| P2.0029   | PRJEB55115      | ERR10020360   | Kuirau Park Feature 87     | 7        | Rotorua          | Apr 2016 | 6.9 | 61.4      | 171      | 1.4     |
| P2.0041   | PRJEB55115      | ERR10020372   | Kuirau Park Feature 87     | 7        | Rotorua          | Jun 2016 | 7.1 | 57.5      | 380      | 3.3     |
| P2.0053   | PRJEB55115      | ERR10020384   | Kuirau Park Feature 87     | 7        | Rotorua          | Aug 2016 | 6.6 | 62.0      | 306      | 2.4     |
| P2.0065   | PRJEB55115      | ERR10020396   | Kuirau Park Feature 87     | 7        | Rotorua          | Oct 2016 | 6.8 | 58.5      | 329      | 2.5     |
| P2.0005   | PRJEB55115      | ERR10020341   | Kuirau Park Feature 101    | 7        | Rotorua          | Dec 2015 | 7.1 | 70.6      | 101      | 1.4     |
| P2.0014   | PRJEB55115      | ERR10020349   | Kuirau Park Feature 101    | 7        | Rotorua          | Feb 2016 | 7.3 | 72.4      | 64       | 1.5     |
| P2.0030   | PRJEB55115      | ERR10020361   | Kuirau Park Feature 101    | 7        | Rotorua          | Apr 2016 | 7.1 | 71.4      | 138      | 1.8     |
| P2.0042   | PRJEB55115      | ERR10020373   | Kuirau Park Feature 101    | 7        | Rotorua          | Jun 2016 | 7.3 | 68.7      | 141      | 2.8     |
| P2.0054   | PRJEB55115      | ERR10020385   | Kuirau Park Feature 101    | 7        | Rotorua          | Aug 2016 | 7.0 | 67.9      | 151      | 2.8     |
| P2.0066   | PRJEB55115      | ERR10020397   | Kuirau Park Feature 101    | 7        | Rotorua          | Oct 2016 | 7.2 | 68.3      | 133      | 2.2     |
| P2.0007   | PRJEB55115      | ERR10020343   | Whakarewarewa Feature 45   | 9        | Rotorua          | Dec 2015 | 8.9 | 69.5      | 219      | 3.2     |
| P2.0025   | PRJEB55115      | ERR10020356   | Whakarewarewa Feature 45   | 9        | Rotorua          | Apr 2016 | 9.0 | 66.2      | 175      | 3.1     |
| P2.0037   | PRJEB55115      | ERR10020368   | Whakarewarewa Feature 45   | 9        | Rotorua          | Jun 2016 | 8.7 | 64.7      | 201      | 3.1     |
| P2.0049   | PRJEB55115      | ERR10020380   | Whakarewarewa Feature 45   | 9        | Rotorua          | Aug 2016 | 8.7 | 64.5      | 232      | 3.4     |
| P2.0061   | PRJEB55115      | ERR10020392   | Whakarewarewa Feature 45   | 9        | Rotorua          | Oct 2016 | 8.8 | 65.5      | 254      | 3.2     |

| Sample ID | Study accession | Run accession | Feature name            | pH group | Geothermal field | Date     | pH  | Temp (°C) | Richness | Shannon |
|-----------|-----------------|---------------|-------------------------|----------|------------------|----------|-----|-----------|----------|---------|
| P2.0009   | PRJEB55115      | ERR10020344   | Whakarewarewa Feature 1 | 9        | Rotorua          | Dec 2015 | 8.3 | 63.4      | 101      | 1.9     |
| P2.0027   | PRJEB55115      | ERR10020358   | Whakarewarewa Feature 1 | 9        | Rotorua          | Apr 2016 | 8.4 | 61.1      | 168      | 2.9     |
| P2.0039   | PRJEB55115      | ERR10020370   | Whakarewarewa Feature 1 | 9        | Rotorua          | Jun 2016 | 8.0 | 70.3      | 108      | 2.5     |
| P2.0051   | PRJEB55115      | ERR10020382   | Whakarewarewa Feature 1 | 9        | Rotorua          | Aug 2016 | 7.8 | 78.1      | 105      | 2.5     |
| P2.0063   | PRJEB55115      | ERR10020394   | Whakarewarewa Feature 1 | 9        | Rotorua          | Oct 2016 | 8.4 | 80.6      | 102      | 2.3     |
| P2.0022   | PRJEB55115      | ERR10020353   | Ohaaki Feature 2        | 9        | Ohaaki           | Apr 2016 | 9.0 | 70.3      | 31       | 0.9     |
| P2.0034   | PRJEB55115      | ERR10020365   | Ohaaki Feature 2        | 9        | Ohaaki           | Jun 2016 | 8.9 | 66.5      | 48       | 1.1     |
| P2.0046   | PRJEB55115      | ERR10020377   | Ohaaki Feature 2        | 9        | Ohaaki           | Aug 2016 | 8.4 | 65.0      | 43       | 1.1     |
| P2.0058   | PRJEB55115      | ERR10020389   | Ohaaki Feature 2        | 9        | Ohaaki           | Oct 2016 | 9.0 | 67.9      | 77       | 1.7     |

**Table S5. Variation in physicochemistry, alpha diversity and taxon relative abundance of control geothermal features.** Variation is presented as standard deviation (SD) from the mean of values measured for pH, temperature (°C), OTU richness, Shannon diversity index, and dominant taxa (>1 % average relative abundance across all samples in this category). Alpha diversity and relative abundances of taxa were calculated via amplicon sequencing of the 16S rRNA gene from DNA extracted from these ecosystems.

| Geothermal feature          | Wairakei  |      | Wairakei   |      | Wairakei   |      | Radiata |      | Champagne |      |
|-----------------------------|-----------|------|------------|------|------------|------|---------|------|-----------|------|
|                             | Feature 5 |      | Feature 13 |      | Feature 14 |      | Pool    |      | Pool      |      |
|                             | Mean      | SD   | Mean       | SD   | Mean       | SD   | Mean    | SD   | Mean      | SD   |
| pH                          | 8.3       | 0.2  | 8.4        | 0.2  | 8.4        | 0.2  | 7.6     | 0.2  | 5.3       | 0.1  |
| Temperature (°C)            | 91.0      | 2.8  | 64.2       | 1.8  | 96.0       | 1.1  | 61.7    | 2.3  | 74.0      | 1.6  |
| OTU richness                | 106.5     | 51.6 | 209.0      | 24.0 | 174.5      | 78.5 | 276.5   | 41.7 | 61.8      | 13.4 |
| Shannon index               | 1.7       | 0.7  | 3.4        | 0.4  | 2.2        | 0.5  | 3.3     | 0.3  | 1.6       | 0.4  |
| Aquificota (%)              | 96.1      | 2.8  | 10.3       | 3.9  | 71.8       | 3.8  | 60.0    | 8.0  | 95.9      | 2.5  |
| Armatimonadota (%)          | 0.0       | 0.0  | 7.5        | 7.5  | 0.2        | 0.1  | 0.3     | 0.0  | 0.0       | 0.0  |
| Bacteroidota (%)            | 0.7       | 1.0  | 18.5       | 4.3  | 13.1       | 16.7 | 1.4     | 0.8  | 0.0       | 0.0  |
| Chlorobiota (%)             | 0.0       | 0.0  | 8.2        | 0.4  | 0.0        | 0.0  | 5.9     | 2.1  | 0.0       | 0.0  |
| Chloroflexota (%)           | 0.0       | 0.1  | 16.3       | 5.1  | 0.2        | 0.2  | 0.8     | 0.1  | 0.0       | 0.0  |
| Deinococcota (%)            | 0.5       | 0.5  | 20.9       | 5.6  | 7.7        | 9.9  | 1.4     | 0.2  | 0.0       | 0.0  |
| Pseudomonadota (%)          | 1.3       | 1.2  | 7.8        | 2.4  | 4.4        | 2.0  | 5.0     | 0.5  | 0.2       | 0.1  |
| Thermodesulfobacteriota (%) | 0.0       | 0.0  | 0.0        | 0.0  | 0.1        | 0.1  | 5.2     | 0.8  | 1.9       | 1.6  |



**Table S6. Variation in physicochemistry, alpha diversity and taxon relative abundance of Waimangu geothermal features.** Variation is presented as standard deviation (SD) from the mean of values measured for pH, temperature (°C), OTU richness, Shannon diversity index, and dominant taxa (>1 % average relative abundance across all samples in this category). Alpha diversity and relative abundances of taxa were calculated via amplicon sequencing of the 16S rRNA gene from DNA extracted from these ecosystems.

| Geothermal feature | Waimangu<br>Feature 2 |      | Waimangu<br>Feature 3 |      | Inferno<br>Crater Lake |      | Waimangu<br>Feature 4 |      | Waimangu<br>Feature 5 |      | Waimangu<br>Feature 6 |       | Waimangu<br>Feature 7 |      |
|--------------------|-----------------------|------|-----------------------|------|------------------------|------|-----------------------|------|-----------------------|------|-----------------------|-------|-----------------------|------|
|                    | Mean                  | SD   | Mean                  | SD   | Mean                   | SD   | Mean                  | SD   | Mean                  | SD   | Mean                  | SD    | Mean                  | SD   |
| pH                 | 6.0                   | 0.1  | 6.6                   | 0.1  | 2.5                    | 0.1  | 4.9                   | 2.6  | 5.2                   | 3.1  | 6.9                   | 0.6   | 6.8                   | 0.2  |
| Temperature (°C)   | 49.0                  | 0.2  | 49.2                  | 0.9  | 55.1                   | 19.9 | 53.3                  | 4.7  | 52.4                  | 4.0  | 38.3                  | 1.8   | 34.0                  | 0.4  |
| OTU richness       | 184.5                 | 9.2  | 198.5                 | 31.8 | 46.5                   | 6.4  | 272.5                 | 72.8 | 236.0                 | 17.0 | 1120.0                | 100.4 | 841.0                 | 9.9  |
| Shannon index      | 2.5                   | 0.2  | 2.5                   | 0.2  | 1.7                    | 0.1  | 3.1                   | 0.4  | 2.9                   | 0.2  | 4.4                   | 0.7   | 4.1                   | 0.5  |
| Aquificota (%)     | 23.2                  | 3.1  | 24.9                  | 5.5  | 4.0                    | 5.3  | 27.0                  | 2.4  | 27.8                  | 7.5  | 16.8                  | 12.3  | 11.8                  | 13.9 |
| Bacteroidota (%)   | 1.9                   | 0.1  | 2.2                   | 0.4  | 0.1                    | 0.1  | 5.6                   | 2.5  | 2.9                   | 0.2  | 9.9                   | 7.2   | 18.6                  | 14.2 |
| Chlorobiota (%)    | 1.4                   | 0.1  | 2.0                   | 1.6  | 0.0                    | 0.0  | 5.5                   | 5.6  | 3.2                   | 2.8  | 1.9                   | 0.8   | 1.2                   | 1.3  |
| Cyanobacteria (%)  | 7.4                   | 9.1  | 10.2                  | 11.0 | 0.0                    | 0.0  | 14.2                  | 14.1 | 9.2                   | 11.7 | 4.4                   | 3.6   | 3.7                   | 4.4  |
| Euryarchaeota (%)  | 0.0                   | 0.0  | 0.0                   | 0.0  | 8.6                    | 2.7  | 0.4                   | 0.5  | 0.0                   | 0.0  | 0.0                   | 0.0   | 0.0                   | 0.0  |
| Parcubacteria (%)  | 0.7                   | 0.6  | 0.8                   | 0.3  | 0.0                    | 0.0  | 1.3                   | 1.5  | 1.0                   | 0.9  | 2.4                   | 1.4   | 0.8                   | 0.3  |
| Pseudomonadota (%) | 63.2                  | 11.1 | 57.8                  | 13.6 | 36.9                   | 51.9 | 35.7                  | 4.6  | 52.4                  | 13.3 | 52.6                  | 7.0   | 56.1                  | 3.4  |
| Thermoproteota (%) | 0.0                   | 0.0  | 0.0                   | 0.0  | 46.1                   | 55.9 | 6.3                   | 8.8  | 0.6                   | 0.8  | 0.1                   | 0.2   | 0.0                   | 0.1  |

**Table S7. Variation in physicochemistry, alpha diversity and taxon relative abundance of Waikite geothermal features.** Variation is presented as standard deviation (SD) from the mean of values measured for pH, temperature (°C), OTU richness, Shannon diversity index, and dominant taxa (>1 % average relative abundance across all samples in this category). Alpha diversity and relative abundances of taxa were calculated via amplicon sequencing of the 16S rRNA gene from DNA extracted from these ecosystems.

| Geothermal feature    | Waikite<br>Feature 3 |       | Waikite<br>Feature 4 |       | Waikite<br>Feature 5 |       | Waikite<br>Feature 6 |       | Waikite<br>Feature 8 |       | Pig<br>Scorcher |      | Big<br>Spring |      |
|-----------------------|----------------------|-------|----------------------|-------|----------------------|-------|----------------------|-------|----------------------|-------|-----------------|------|---------------|------|
|                       | Mean                 | SD    | Mean                 | SD    | Mean                 | SD    | Mean                 | SD    | Mean                 | SD    | Mean            | SD   | Mean          | SD   |
| pH                    | 8.4                  | 0.1   | 8.3                  | 0.2   | 8.3                  | 0.2   | 7.9                  | 0.4   | 8.1                  | 0.6   | 7.2             | 0.1  | 7.5           | 0.0  |
| Temperature (°C)      | 40.4                 | 2.8   | 42.4                 | 3.5   | 67.3                 | 2.1   | 37.6                 | 13.5  | 35.6                 | 10.3  | 92.3            | 4.5  | 95.5          | 1.4  |
| OTU richness          | 958.8                | 272.6 | 1291.3               | 301.7 | 844.8                | 138.5 | 1529.8               | 800.4 | 1750.8               | 758.7 | 200.3           | 71.7 | 347.5         | 89.8 |
| Shannon index         | 4.5                  | 0.6   | 4.9                  | 0.6   | 4.8                  | 0.3   | 5.5                  | 0.8   | 5.6                  | 1.1   | 2.0             | 1.0  | 3.9           | 0.0  |
| Aquificota (%)        | 0.1                  | 0.0   | 0.0                  | 0.0   | 1.4                  | 0.5   | 0.0                  | 0.0   | 0.0                  | 0.0   | 76.5            | 19.3 | 45.6          | 1.8  |
| Bacillota (%)         | 0.7                  | 0.7   | 0.8                  | 0.7   | 4.2                  | 3.9   | 0.8                  | 0.8   | 1.1                  | 0.8   | 0.4             | 0.3  | 5.8           | 6.4  |
| Bacteria (%)          | 0.7                  | 0.5   | 0.9                  | 0.3   | 1.7                  | 0.3   | 3.2                  | 2.3   | 1.5                  | 1.3   | 2.0             | 3.2  | 0.6           | 0.0  |
| Bacteroidota (%)      | 10.4                 | 2.7   | 10.2                 | 2.7   | 22.0                 | 5.8   | 17.0                 | 15.9  | 14.7                 | 7.3   | 0.7             | 0.5  | 4.9           | 2.8  |
| Chlamydiota (%)       | 0.4                  | 0.3   | 0.6                  | 0.4   | 1.5                  | 2.8   | 1.9                  | 3.0   | 2.5                  | 3.8   | 0.0             | 0.0  | 0.3           | 0.4  |
| Chlorobiota (%)       | 0.7                  | 0.4   | 0.8                  | 0.5   | 5.2                  | 6.7   | 2.4                  | 2.1   | 1.0                  | 0.9   | 0.2             | 0.0  | 0.5           | 0.4  |
| Chloroflexota (%)     | 0.5                  | 0.3   | 0.5                  | 0.3   | 5.9                  | 5.8   | 1.4                  | 0.9   | 0.4                  | 0.3   | 0.3             | 0.1  | 1.1           | 0.6  |
| Cyanobacteria (%)     | 10.0                 | 7.6   | 5.3                  | 4.5   | 2.6                  | 4.5   | 6.9                  | 7.9   | 2.5                  | 1.7   | 0.9             | 1.1  | 0.6           | 0.1  |
| Deinococcota (%)      | 0.1                  | 0.1   | 0.2                  | 0.1   | 3.4                  | 3.3   | 0.1                  | 0.1   | 0.1                  | 0.1   | 12.0            | 16.1 | 8.1           | 3.5  |
| Parcubacteria (%)     | 1.4                  | 1.0   | 2.3                  | 1.8   | 6.0                  | 1.9   | 9.2                  | 9.9   | 8.0                  | 9.4   | 0.2             | 0.1  | 1.5           | 1.0  |
| Planctomycetota (%)   | 1.3                  | 0.7   | 1.6                  | 0.4   | 0.5                  | 0.3   | 1.2                  | 1.0   | 1.6                  | 0.8   | 0.0             | 0.0  | 0.7           | 0.2  |
| Pseudomonadota (%)    | 65.9                 | 10.5  | 68.0                 | 10.9  | 27.6                 | 7.0   | 39.6                 | 20.4  | 52.8                 | 12.4  | 3.2             | 2.4  | 22.5          | 9.8  |
| Verrucomicrobiota (%) | 2.3                  | 1.4   | 2.9                  | 1.2   | 1.6                  | 0.9   | 4.8                  | 4.7   | 2.8                  | 0.7   | 0.0             | 0.0  | 1.1           | 0.5  |
| Woesearchaeota (%)    | 0.1                  | 0.1   | 0.5                  | 0.4   | 1.8                  | 1.4   | 2.3                  | 2.2   | 1.9                  | 1.6   | 0.0             | 0.0  | 0.1           | 0.2  |

**Table S8. Variation in physicochemistry, alpha diversity and taxon relative abundance of geothermal features across the pH range.** Variation is presented as standard deviation (SD) from the mean of values measured for pH, temperature (°C), OTU richness, Shannon diversity index, and dominant taxa (>1 % average relative abundance across all samples in this category). Alpha diversity and relative abundances of taxa were calculated via amplicon sequencing of the 16S rRNA gene from DNA extracted from these ecosystems.

| pH group                    | 3                           |      | 3                           |      | 3                     |     | 5                           |     | 5                             |      | 5                         |      |
|-----------------------------|-----------------------------|------|-----------------------------|------|-----------------------|-----|-----------------------------|-----|-------------------------------|------|---------------------------|------|
| Geothermal feature          | Whakarewarewa<br>Feature 53 |      | Whakarewarewa<br>Feature 51 |      | Te Puia<br>Feature 11 |     | Waiotapu No.16<br>Feature 1 |     | Artist's Palette<br>Feature 1 |      | Kuirau Park<br>Feature 60 |      |
|                             | Mean                        | SD   | Mean                        | SD   | Mean                  | SD  | Mean                        | SD  | Mean                          | SD   | Mean                      | SD   |
| pH                          | 3.0                         | 0.1  | 4.1                         | 0.6  | 2.5                   | 0.1 | 4.7                         | 0.2 | 4.8                           | 0.1  | 5.0                       | 0.3  |
| Temperature (°C)            | 56.0                        | 4.0  | 64.9                        | 4.4  | 64.8                  | 2.5 | 66.7                        | 1.2 | 66.2                          | 4.1  | 54.3                      | 5.7  |
| OTU richness                | 35.0                        | 5.7  | 32.0                        | 9.4  | 19.8                  | 3.0 | 35.0                        | 2.8 | 69.8                          | 16.8 | 96.3                      | 26.8 |
| Shannon index               | 1.7                         | 0.4  | 1.6                         | 0.3  | 1.1                   | 0.1 | 1.1                         | 0.2 | 1.4                           | 0.2  | 1.9                       | 0.1  |
| Aquificota (%)              | 21.1                        | 33.1 | 24.1                        | 20.2 | 0.6                   | 0.5 | 86.1                        | 6.3 | 80.8                          | 11.1 | 46.6                      | 24.7 |
| Armatimonadota (%)          | 0.0                         | 0.0  | 0.0                         | 0.0  | 0.0                   | 0.0 | 0.0                         | 0.0 | 0.0                           | 0.0  | 0.0                       | 0.0  |
| Bacteroidota (%)            | 0.0                         | 0.0  | 0.0                         | 0.0  | 0.0                   | 0.0 | 0.0                         | 0.0 | 0.1                           | 0.1  | 0.1                       | 0.1  |
| Deinococcota (%)            | 0.0                         | 0.0  | 0.0                         | 0.0  | 0.0                   | 0.0 | 0.0                         | 0.0 | 0.0                           | 0.0  | 0.0                       | 0.0  |
| Euryarchaeota (%)           | 11.0                        | 7.5  | 22.5                        | 12.6 | 5.1                   | 5.0 | 3.8                         | 2.3 | 3.7                           | 1.8  | 1.1                       | 0.8  |
| Pseudomonadota (%)          | 59.5                        | 27.9 | 0.4                         | 0.4  | 0.0                   | 0.0 | 0.0                         | 0.1 | 2.0                           | 2.7  | 49.0                      | 24.4 |
| Thermodesulfobacteriota (%) | 0.0                         | 0.0  | 0.0                         | 0.0  | 0.0                   | 0.0 | 0.0                         | 0.0 | 0.1                           | 0.1  | 0.1                       | 0.2  |
| Thermoproteota (%)          | 0.1                         | 0.2  | 49.7                        | 33.6 | 89.7                  | 6.2 | 10.0                        | 4.4 | 13.0                          | 10.9 | 0.3                       | 0.1  |
| Thermotogota (%)            | 8.0                         | 4.0  | 0.1                         | 0.1  | 0.0                   | 0.0 | 0.0                         | 0.0 | 0.1                           | 0.1  | 0.3                       | 0.3  |

| pH group                    | 7         |      | 7           |      | 7           |      | 9             |      | 9             |      | 9         |      |
|-----------------------------|-----------|------|-------------|------|-------------|------|---------------|------|---------------|------|-----------|------|
| Geothermal feature          | Whangapoa |      | Kuirau Park |      | Kuirau Park |      | Whakarewarewa |      | Whakarewarewa |      | Ohaaki    |      |
|                             | Feature 1 |      | Feature 87  |      | Feature 101 |      | Feature 45    |      | Feature 1     |      | Feature 2 |      |
|                             | Mean      | SD   | Mean        | SD   | Mean        | SD   | Mean          | SD   | Mean          | SD   | Mean      | SD   |
| pH                          | 7.3       | 0.2  | 6.8         | 0.2  | 7.2         | 0.1  | 8.8           | 0.1  | 8.2           | 0.3  | 8.8       | 0.3  |
| Temperature (°C)            | 62.8      | 1.7  | 60.6        | 2.6  | 69.9        | 1.8  | 66.1          | 2.0  | 70.7          | 8.6  | 67.4      | 2.3  |
| OTU richness                | 120.8     | 18.7 | 276.4       | 89.4 | 121.3       | 32.8 | 216.2         | 30.1 | 116.8         | 28.8 | 49.8      | 19.5 |
| Shannon index               | 2.5       | 0.4  | 2.4         | 0.7  | 2.1         | 0.6  | 3.2           | 0.1  | 2.4           | 0.4  | 1.2       | 0.4  |
| Aquificota (%)              | 3.8       | 0.7  | 71.7        | 12.4 | 74.8        | 7.3  | 35.6          | 5.2  | 39.3          | 28.2 | 73.2      | 42.3 |
| Armatimonadota (%)          | 28.0      | 10.4 | 0.1         | 0.0  | 0.2         | 0.1  | 0.0           | 0.0  | 0.0           | 0.0  | 1.0       | 0.6  |
| Bacteroidota (%)            | 9.5       | 6.4  | 2.2         | 1.8  | 0.4         | 0.2  | 0.9           | 0.3  | 2.0           | 2.9  | 0.3       | 0.2  |
| Deinococcota (%)            | 38.0      | 16.1 | 1.0         | 1.3  | 10.4        | 9.1  | 5.6           | 3.3  | 33.1          | 27.3 | 19.5      | 33.5 |
| Euryarchaeota (%)           | 0.0       | 0.0  | 0.5         | 0.5  | 0.1         | 0.1  | 0.0           | 0.0  | 0.1           | 0.1  | 0.0       | 0.0  |
| Pseudomonadota (%)          | 6.0       | 4.0  | 4.0         | 1.9  | 1.0         | 0.8  | 29.3          | 7.6  | 3.9           | 3.4  | 1.4       | 0.9  |
| Thermodesulfobacteriota (%) | 0.1       | 0.0  | 2.6         | 1.6  | 1.8         | 1.2  | 11.4          | 2.9  | 9.2           | 5.0  | 3.0       | 5.5  |
| Thermoproteota (%)          | 0.0       | 0.0  | 0.4         | 0.3  | 7.7         | 5.4  | 0.1           | 0.0  | 0.3           | 0.1  | 0.0       | 0.0  |
| Thermotogota (%)            | 0.4       | 0.1  | 0.4         | 0.2  | 0.5         | 0.3  | 5.8           | 1.8  | 2.8           | 1.3  | 0.3       | 0.4  |
